# Supplementary material
Source: publisher figshare collection journal article supplement (https://karger.figshare.com/ndownloader/files/15616025)
Supplement: Supplementary file 1 [file 15616025]

## Sheet: Sheet1
Table S2. C. versicolor sex-associated contigs compared to A. carolinensis genome sequence.
			C. versicolor contig compared to A. carolinensis (BLASTN)
RAD-tag	C. versicolor contig	Query length	A. carolinensis location	Overlapping gene	Orientation	Query start	Query end	Alignment length	Score	e-val	%ID
50614	flattened_line_1441506	468	3:26859364-26859386	CLSTN2	Reverse	147	169	23	46.1	0.011	100
	flattened_line_1441506	468	3:89458138-89458160		Forward	106	128	23	46.1	0.011	100
32131	flattened_line_5677740	227	4:58298382-58298416		Reverse	188	222	35	54	2e-05	94.29
32131	flattened_line_3257802	313	2:190708746-190708775		Reverse	188	217	30	52	0.0001	96.67
29146	flattened_line_732202	943	6:45600300-45600347	BBS9	Forward	321	368	48	63.9	9e-08	91.67
	flattened_line_732202	943	1:47569215-47569274		Reverse	321	380	60	63.9	9e-08	88.33
29146	flattened_line_637053	1078	6:45600300-45600347	BBS9	Forward	82	129	48	63.9	1e-07	91.67
	flattened_line_637053	1078	1:47569215-47569274		Reverse	82	141	60	63.9	1e-07	88.33
18180	flattened_line_1974696	398	LGc:7543664-7543688		Forward	255	279	25	50.1	0.0006	100
18180	flattened_line_495004	1289	4:136671830-136671865		Forward	847	882	36	63.9	1e-07	97.22
	flattened_line_495004	1289	4:136676841-136676876		Forward	847	882	36	63.9	1e-07	97.22
	flattened_line_495004	1289	2:149926198-149926233	HYAL2	Forward	847	882	36	63.9	1e-07	97.22
